# Supplementary material for: Dairy Consumption and Incidence of Breast Cancer in the ‘Seguimiento Universidad de Navarra’ (SUN) Project
Source: MDPI journal article supplement (doi:10.3390/nu13020687), 2021-02-21
Supplement: s1 [file s1]

## Supplemental material

**Supplemental Table S1.** Description of different dairy products considered in the different categories of main food groups as baseline exposures.

| Food groups categories              | Specific sub-groups                                                                                                                                                                                                                                                                           |
|-------------------------------------|-----------------------------------------------------------------------------------------------------------------------------------------------------------------------------------------------------------------------------------------------------------------------------------------------|
| All dairy products                  | Whole- fat milk<br>Semi/skimmed milk<br>Condensed milk<br>Cream or milk cream<br>Milkshakes<br>Whole yogurt<br>Skimmed yogurt<br>Petit-suisse<br>Cottage cheese or curd<br>Portioned or creamy cheese<br>Cured and semi-cured cheeses<br>Fresh cheese<br>Custard, flan, pudding<br>Ice-creams |
| Whole-fat dairy product consumption | Whole- fat milk<br>Condensed milk<br>Cream or milk cream<br>Milkshakes<br>Whole yogurt/ Petit-suisse<br>Portioned or creamy cheese<br>Custard, flan, pudding<br>Ice-creams<br>Cured and semi-cured cheeses                                                                                    |
| Low-fat dairy product consumption   | Semi/skimmed milk<br>Skimmed yogurt<br>Fresh cheese                                                                                                                                                                                                                                           |
| Fermented dairy product consumption | Whole yogurt<br>Skimmed yogurt<br>Petit-suisse<br>Cottage cheese or curd/Fresh cheese<br>Portioned or creamy cheese<br>Cured and semi-cured cheeses<br>Fresh cheese                                                                                                                           |

**Supplemental Table S2:** Hazard ratio (HR) and 95% confidence intervals (CI) of confirmed breast cancer cases according to the categories of baseline total dairy, whole-fat, low-fat and fermented dairy product consumption among 10,930 women of the SUN Project.

|                                    | Dairy product consumption           |                    |                   |                  | <i>P for trend</i> |
|------------------------------------|-------------------------------------|--------------------|-------------------|------------------|--------------------|
|                                    | Q1 (Ref)                            | Q2                 | Q3                | Q4               |                    |
| N                                  | 2733                                | 2732               | 2733              | 2732             |                    |
| Median Dairy product               | 1.6                                 | 2.5                | 3.4               | 4.8              |                    |
| Cases                              | 41                                  | 23                 | 19                | 36               |                    |
| Person-years of follow-up          | 30,609                              | 30,506             | 31,368            | 30,811           |                    |
| Incidence rate/10,000 person-years | 13.39                               | 7.53               | 6.05              | 11.68            |                    |
| Age-adjusted HR (95% CI)           | 1.00 (Ref.)                         | 0.59 (0.35-0.99)   | 0.45 (0.26-0.78)  | 0.89(0.57-1.39)  | 0.461              |
| Multivariable adjusted model 1     | 1.00 (Ref.)                         | 0.64 (0.37-1.09)   | 0.53 (0.28-1.00)  | 1.19 (0.61-2.31) | 0.843              |
| Multivariable adjusted model 2     | 1.00 (Ref.)                         | 0.62 (0.36-1.07)   | 0.51 (0.27-0.97)* | 1.15 (0.58-2.26) | 0.924              |
|                                    | Whole-fat dairy product consumption |                    |                   |                  | <i>P for trend</i> |
|                                    | Q1 (Ref)                            | Q2                 | Q3                | Q4               |                    |
| N                                  | 2733                                | 2732               | 2733              | 2732             |                    |
| Median whole-fat dairy product     | 0.6                                 | 1.19               | 1.18              | 3.1              |                    |
| Cases                              | 29                                  | 32                 | 28                | 30               |                    |
| Person-years of follow-up          | 29,397                              | 29,672             | 31,367            | 32,859           |                    |
| Incidence rate/10,000 person-years | 9.86                                | 10.78              | 8.92              | 9.12             |                    |
| Age-adjusted HR (95% CI)           | 1.00 (Ref.)                         | 1.19 (0.71-1.97)   | 1.01 (0.60-1.72)  | 1.09 (0.65-1.83) | 0.889              |
|                                    | Low-fat dairy product consumption   |                    |                   |                  | <i>P for trend</i> |
|                                    | Q1 (Ref)                            | Q2                 | Q3                | Q4               |                    |
| N                                  | 2,733                               | 2732               | 2,733             | 2732             |                    |
| Median low-fat dairy product       | 0.67                                | 0.68               | 1.5               | 3                |                    |
| Cases                              | 44                                  | 23                 | 24                | 28               |                    |
| Person-years of follow-up          | 33,043                              | 30,357             | 29,727            | 29,727           |                    |
| Incidence rate/10,000 person-years | 13.31                               | 7.57               | 8.07              | 9.28             |                    |
| Age-adjusted HR (95% CI)           | 1.00 (Ref.)                         | 0.57 (0.34-0.95)   | 0.58 (0.35-0.96)  | 0.63 (0.39-1.03) | 0.070              |
|                                    | Fermented dairy product consumption |                    |                   |                  | <i>P for trend</i> |
|                                    | Q1 (Ref)                            | Q2                 | Q3                | Q4               |                    |
| N                                  | 2733                                | 2732               | 2733              | 2732             |                    |
| Median fermented dairy product     | 0.5                                 | 1.04               | 1.6               | 2.6              |                    |
| Cases                              | 30                                  | 29                 | 33                | 27               |                    |
| Person-years of follow-up          | 31,229                              | 30,973             | 30,896            | 30,196           |                    |
| Incidence rate/10,000 person-years | 9.60                                | 9.36               | 10.68             | 8.94             |                    |
| Age-adjusted HR (95% CI)           | 1.00 (Ref.)                         | 0.99 (0.59 - 1.65) | 1.08 (0.66-1.78)  | 0.91 (0.54-1.53) | 0.835              |

\**p* value < 0.05. Results from Cox regression models. All Cox models were stratified for age (decades) and recruitment period. **Model 1** additionally adjusted for height, years at university, family history of BC (none, after 45 years or before 45 years), smoking status (never smoker, former smoker, current smoker), lifetime tobacco exposure (pack-years), physical activity (Mets-h/week), TV-watching (h/day), alcohol intake (g/day, continuous), BMI (<25, 25-<30, ≥30), age of menarche (<10 years, 10–11 years, 12–13 years, ≥14 years), age at menopause (<50 years, ≥50 years), history of pregnancy (age <25 years & nulliparous, age ≥25 years & nulliparous, first pregnancy before 25 years, first pregnancy between 25 & 30 years of age, first pregnancy being 30 years old or older), months of breastfeeding (continuous), use of hormone replacement therapy (yes/no) and its duration (continuous), energy intake(kcal/day), energy-adjusted intake of calcium, vitamin D and saturated fat from non-dairy products (tertiles), coffee consumption (<1, ≥1), sugar-sweetened beverage consumption (never/seldom, ≥1 serving per week) and oral contraceptives (yes/no). **Model 2** additionally adjusted for Mediterranean Diet Adherence Screener (score MEDAS without alcohol and dairy product items) (continuous).

**Supplemental Table S3:** Hazard ratio (HR) and 95% confidence intervals (CI) of confirmed premenopausal breast cancer cases according to the categories of baseline total dairy, whole-fat, low-fat and fermented dairy product consumption among 9,971 women of the SUN Project.

|                                    | Dairy product consumption           |                    |                   |                  | <i>P for trend</i> |
|------------------------------------|-------------------------------------|--------------------|-------------------|------------------|--------------------|
|                                    | Q1 (Ref)                            | Q2                 | Q3                | Q4               |                    |
| Premenopausal BC                   |                                     |                    |                   |                  |                    |
| N                                  | 2493                                | 2493               | 2493              | 2492             |                    |
| Median dairy product               | 1.8                                 | 2.7                | 3.6               | 4.9              |                    |
| Incident Cases                     | 20                                  | 16                 | 9                 | 22               |                    |
| Person-years of follow-up          | 23,954                              | 24,344             | 25,245            | 24,389           |                    |
| Incidence rate/10,000 person-years | 8.34                                | 6.57               | 3.56              | 9.02             |                    |
| Age-adjusted HR (95% CI)           | 1.00 (Ref.)                         | 0.84 (0.43- 1.62)  | 0.42 (0.19-0.92)  | 1.08 (0.58-1.98) | 0.933              |
| Multivariable adjusted model 1     | 1.00 (Ref.)                         | 0.88 (0.44-1.77)   | 0.50 (0.19-1.26)  | 1.37 (0.59-3.20) | 0.447              |
| Multivariable adjusted model 2     | 1.00 (Ref.)                         | 0.88 (0.43- 1.78)  | 0.49 (0.19-1.27)  | 1.36 (0.58-3.22) | 0.456              |
|                                    | Whole-fat dairy product consumption |                    |                   |                  | <i>P for trend</i> |
|                                    | Q1 (Ref)                            | Q2                 | Q3                | Q4               |                    |
| Premenopausal BC                   |                                     |                    |                   |                  |                    |
| N                                  | 2493                                | 2493               | 2493              | 2492             |                    |
| Mean whole-fat dairy product       | 0.6                                 | 1.2                | 1.8               | 3                |                    |
| Incident cases                     | 16                                  | 14                 | 17                | 20               |                    |
| Person-years of follow-up          | 21,544                              | 23,534             | 25,522            | 27,332           |                    |
| Incidence rate/10,000 person-years | 7.42                                | 5.94               | 6.66              | 7.31             |                    |
| Age-adjusted HR (95% CI)           | 1.00 (Ref.)                         | 0.76 (0.37-1.57)   | 0.94 (0.47-1.85)  | 1.08 (0.56-2.08) | 0.603              |
| Multivariable adjusted model 1     | 1.00 (Ref.)                         | 0.75 (0.36-1.58)   | 0.95 (0.48-1.88)  | 1.17 (0.62-2.21) | 0.416              |
| Multivariable adjusted model 2     | 1.00 (Ref.)                         | 0.75 (0.36-1.57)   | 0.95 (0.48-1.89)  | 1.17 (0.61-2.22) | 0.423              |
|                                    | Low-fat dairy product consumption   |                    |                   |                  | <i>P for trend</i> |
|                                    | Q1 (Ref)                            | Q2                 | Q3                | Q4               |                    |
| Premenopausal BC                   |                                     |                    |                   |                  |                    |
| N                                  | 2493                                | 2493               | 2493              | 2492             |                    |
| Median low-fat dairy product       | 0.1                                 | 1                  | 1.7               | 3                |                    |
| Incident cases                     | 29                                  | 9                  | 13                | 16               |                    |
| Person-years of follow-up          | 26,719                              | 24,414             | 23,747            | 23,052           |                    |
| Incidence rate/10,000 person-years | 10.85                               | 3.68               | 5.47              | 6.94             |                    |
| Age-adjusted HR (95% CI)           | 1.00 (Ref.)                         | 0.40 (0.19-0.83)   | 0.49 (0.25-0.95)  | 0.60 (0.32-1.12) | 0.159              |
| Multivariable adjusted model 1     | 1.00 (Ref.)                         | 0.41 (0.19- 0.85)  | 0.48 (0.23- 0.99) | 0.56 (0.24-1.30) | 0.207              |
| Multivariable adjusted model 2     | 1.00 (Ref.)                         | 0.41 (0.19- 0.86)* | 0.48 (0.23-1.00)* | 0.56 (0.24-1.30) | 0.207              |
|                                    | Fermented dairy product consumption |                    |                   |                  | <i>P for trend</i> |
|                                    | Q1 (Ref)                            | Q2                 | Q3                | Q4               |                    |
| Premenopausal BC                   |                                     |                    |                   |                  |                    |
| N                                  | 2493                                | 2493               | 2493              | 2492             |                    |
| Median fermented dairy product     | 0.6                                 | 1                  | 1.7               | 2.7              |                    |
| Incident cases                     | 16                                  | 13                 | 23                | 15               |                    |
| Person-years of follow-up          | 24,455                              | 25,100             | 24,333            | 24,044           |                    |
| Incidence rate/10,000 person-years | 6.54                                | 5.17               | 9.45              | 6.23             |                    |
| Age-adjusted HR (95% CI)           | 1.00 (Ref.)                         | 0.80 (0.38-1.67)   | 1.37 (0.72-2.60)  | 0.90 (0.44-1.82) | 0.995              |
| Multivariable adjusted model 1     | 1.00 (Ref.)                         | 0.86 (0.40-1.88)   | 1.53 (0.78- 2.98) | 1.10 (0.54-2.24) | 0.555              |
| Multivariable adjusted model 2     | 1.00 (Ref.)                         | 0.86 (0.39-1.89)   | 1.53 (0.78-2.98)  | 1.10 (0.56-2.24) | 0.552              |

\**p* value < 0.05. Results from Cox regression models. All Cox models were stratified for age (decades) and recruitment period. **Model 1** additionally adjusted for height, years at university, family history of BC (none, after 45 years or before 45 years), smoking status (never smoker, former smoker, current smoker), lifetime tobacco exposure (pack-years), physical activity (Mets/week), hours tv, alcohol intake (g/day,

continuous), BMI ( $<25$ ,  $25\text{--}30$ ,  $\geq 30$ ), age of menarche ( $<10$  years, 10–11 years, 12–13 years,  $\geq 14$  years), history of pregnancy (age  $<25$  years & nulliparous, age  $\geq 25$  years & nulliparous, first pregnancy before 25 years, first pregnancy between 25 & 30 years of age, first pregnancy being 30 years old or older), months of breastfeeding (continuous), energy intake (kcal/day), energy-adjusted intake of calcium, vitamin D and saturated fat from non-dairy products (tertiles), coffee consumption ( $<1$  and  $\geq 1$ ), sugar-sweetened beverage consumption (never/seldom,  $\geq 1$  serving per week) and oral contraceptives (yes/no). **Model 2** additionally adjusted for Mediterranean Diet Adherence Screener (score MEDAS without alcohol and dairy product items) (continuous).

**Supplemental Table S4:** Hazard ratio (HR) and 95% confidence intervals (CI) of confirmed postmenopausal breast cancer cases according to the categories of baseline total dairy, whole-fat, low-fat and fermented dairy product consumption among 3,299 women of the SUN Project.

|                                    | Dairy product consumption           |                   |                   |                  |                    |
|------------------------------------|-------------------------------------|-------------------|-------------------|------------------|--------------------|
|                                    | Q1 (Ref)                            | Q2                | Q3                | Q4               | <i>P for trend</i> |
| Postmenopausal BC                  |                                     |                   |                   |                  |                    |
| N                                  | 825                                 | 825               | 825               | 824              |                    |
| Median dairy product               | 1.7                                 | 2.6               | 3.6               | 5                |                    |
| Incident Cases                     | 15                                  | 10                | 7                 | 11               |                    |
| Person-years of follow-up          | 5,938                               | 5,252             | 5,403             | 5,891            |                    |
| Incidence rate/10,000 person-years | 30.31                               | 13.32             | 12.95             | 18.67            |                    |
| Age-adjusted HR (95% CI)           | 1.00 (Ref.)                         | 0.38 (0.15-0.91)  | 0.37 (0.15-0.89)  | 0.58 (0.27-1.24) | 0.178              |
| Multivariable adjusted model 1     | 1.00 (Ref.)                         | 0.37 (0.16-0.86)  | 0.34 (0.13-0.89)  | 0.60 (0.20-1.76) | 0.484              |
| Multivariable adjusted model 2     | 1.00 (Ref.)                         | 0.37 (0.15-0.87)* | 0.34 (0.13-0.88)* | 0.60 (0.21-1.74) | 0.486              |
|                                    | Whole-fat dairy product consumption |                   |                   |                  |                    |
|                                    | Q1 (Ref)                            | Q2                | Q3                | Q4               | <i>P for trend</i> |
| Postmenopausal BC                  |                                     |                   |                   |                  |                    |
| N                                  | 825                                 | 825               | 825               | 824              |                    |
| Median whole-fat dairy             | 0.5                                 | 1                 | 1.6               | 2.9              |                    |
| Incident Cases                     | 10                                  | 15                | 9                 | 9                |                    |
| Person-years of follow-up          | 7,164                               | 5,578             | 5,078             | 4,664            |                    |
| Incidence rate/10,000 person-years | 16.74                               | 23.30             | 19.69             | 17.15            |                    |
| Age-adjusted HR (95% CI)           | 1.00 (Ref.)                         | 1.55 (0.69-3.46)  | 0.94 (0.38-2.33)  | 0.98 (0.39-2.44) | 0.666              |
| Multivariable adjusted model 1     | 1.00 (Ref.)                         | 1.86 (0.78-4.46)  | 1.08 (0.40-2.95)  | 0.89 (0.35-2.28) | 0.394              |
| Multivariable adjusted model 2     | 1.00 (Ref.)                         | 1.86 (0.78-4.46)  | 1.09 (0.40-2.97)  | 0.89 (0.34-2.31) | 0.404              |
|                                    | Low-fat dairy product consumption   |                   |                   |                  |                    |
|                                    | Q1 (Ref)                            | Q2                | Q3                | Q4               | <i>P for trend</i> |
| Postmenopausal BC                  |                                     |                   |                   |                  |                    |
| N                                  | 825                                 | 825               | 825               | 824              |                    |
| Median low-fat dairy               | 0.1                                 | 1                 | 2                 | 3.4              |                    |
| Incident Cases                     | 13                                  | 11                | 11                | 8                |                    |
| Person-years of follow-up          | 5,396                               | 5,175             | 5,367             | 6,546            |                    |
| Incidence rate/10,000 person-years | 24.09                               | 21.25             | 16.76             | 15.27            |                    |
| Age-adjusted HR (95% CI)           | 1.00 (Ref.)                         | 0.85 (0.39-1.88)  | 0.62 (0.26-1.47)  | 0.58 (0.24-1.39) | 0.186              |
| Multivariable adjusted model 1     | 1.00 (Ref.)                         | 1.07 (0.46-2.49)  | 0.90 (0.36-2.29)  | 0.95 (0.35-2.59) | 0.848              |
| Multivariable adjusted model 2     | 1.00 (Ref.)                         | 1.07 (0.46-2.48)  | 0.90 (0.36-2.30)  | 0.95 (0.35-2.59) | 0.853              |
|                                    | Fermented dairy product consumption |                   |                   |                  |                    |
|                                    | Q1 (Ref)                            | Q2                | Q3                | Q4               | <i>P for trend</i> |
| Postmenopausal BC                  |                                     |                   |                   |                  |                    |
| N                                  | 825                                 | 825               | 825               | 824              |                    |
| Median fermented dairy             | 0.6                                 | 1                 | 1.7               | 2.8              |                    |
| Incident Cases                     | 12                                  | 12                | 9                 | 10               |                    |
| Person-years of follow-up          | 5,980                               | 5,152             | 5,745             | 5,607            |                    |
| Incidence rate/10,000 person-years | 20.06                               | 23.28             | 15.66             | 17.83            |                    |
| Age-adjusted HR (95% CI)           | 1.00 (Ref.)                         | 0.95 (0.42-2.12)  | 0.69 (0.29-1.66)  | 0.81 (0.34-1.88) | 0.555              |
| Multivariable adjusted model 1     | 1.00 (Ref.)                         | 1.16 (0.49-2.77)  | 0.90 (0.40-2.03)  | 1.16 (0.46-2.93) | 0.855              |
| Multivariable adjusted model 2     | 1.00 (Ref.)                         | 1.16 (0.48-2.77)  | 0.90 (0.40-2.03)  | 1.15 (0.46-2.92) | 0.860              |

\**p* value < 0.05. Results from Cox regression models. All Cox models were stratified for age (decades) and recruitment period. **Model 1** additionally adjusted for height, years at university, family history of BC (none, after 45 years or before 45 years), smoking status (never smoker, former smoker, current smoker),

lifetime tobacco exposure (pack-years), physical activity (Mets/week), hours tv, alcohol intake (g/day, continuous), BMI (<25, 25–<30, ≥30), age of menarche (<10 years, 10–11 years, 12–13 years, ≥14 years), age at menopause (<50 years, ≥50 years), history of pregnancy (age <25 years & nulliparous, age ≥25 years & nulliparous, first pregnancy before 25 years, first pregnancy between 25 & 30 years of age, first pregnancy being 30 years old or older), months of breastfeeding (continuous), use of hormone replacement therapy (yes/no) and its duration (continuous), energy intake (kcal/day), energy-adjusted intake of calcium, vitamin D and saturated fat from non-dairy products (tertiles), coffee consumption (<1 and ≥1), sugar-sweetened beverage consumption (never/seldom, ≥1 serving per week) and oral contraceptives (yes/no). **Model 2** additionally adjusted for Mediterranean Diet Adherence Screener (score MEDAS without alcohol and dairy product items) (continuous).
